# Supplementary material for: The Influence of Different Crop Mulches on Weed Infestation, Soil Properties and Productivity of Wheat under Conventional and Conservation Production Systems
Source: MDPI journal article supplement (doi:10.3390/plants12010009), 2022-12-20
Supplement: s1 [file s1]

## Supplementary Materials

**Table S1.** Analysis of variance for the individual and interactive effect of different mulches and production systems on soil bulk density and soil porosity after wheat harvest.

| Location                                | SOV                    | DF | Sum of Squares | Mean Squares | F value | P value  |
|-----------------------------------------|------------------------|----|----------------|--------------|---------|----------|
| Soil bulk density (g cm <sup>-3</sup> ) |                        |    |                |              |         |          |
| Faisalabad                              | Mulches (M)            | 6  | 0.01831        | 0.00305      | 27.57   | 0.003**  |
|                                         | Production systems (P) | 2  | 0.07493        | 0.03747      | 338.59  | 0.0012** |
|                                         | M × P                  | 12 | 0.00317        | 0.00026      | 2.39    | 0.0197*  |
| Hafizabad                               | Mulches (M)            | 6  | 0.01582        | 0.00264      | 80.08   | 0.0000** |
|                                         | Production systems (P) | 2  | 0.08213        | 0.04106      | 1247.39 | 0.0000** |
|                                         | M × P                  | 12 | 0.00393        | 0.00033      | 9.94    | 0.0000** |
| Multan                                  | Mulches (M)            | 6  | 0.01512        | 0.00252      | 94.66   | 0.0200*  |
|                                         | Production systems (P) | 2  | 0.07183        | 0.03591      | 1349.32 | 0.0010** |
|                                         | M × P                  | 12 | 0.00425        | 0.00035      | 13.30   | 0.0300*  |
| Soil porosity (%)                       |                        |    |                |              |         |          |
| Faisalabad                              | Mulches (M)            | 6  | 38.934         | 6.489        | 5.22    | 0.0205*  |
|                                         | Production systems (P) | 2  | 277.033        | 138.516      | 111.47  | 0.0310*  |
|                                         | M × P                  | 12 | 33.771         | 2.814        | 2.2     | 0.0265*  |
| Hafizabad                               | Mulches (M)            | 6  | 19.373         | 3.229        | 2.61    | 0.0313*  |
|                                         | Production systems (P) | 2  | 201.880        | 100.940      | 81.64   | 0.0000** |
|                                         | M × P                  | 12 | 31.541         | 2.628        | 2.13    | 0.0371*  |
| Multan                                  | Mulches (M)            | 6  | 29.600         | 4.933        | 10.14   | 0.0000** |
|                                         | Production systems (P) | 2  | 319.296        | 159.648      | 328.14  | 0.03000* |
|                                         | M × P                  | 12 | 47.544         | 3.962        | 8.14    | 0.02000* |

SOV = sources of variation, DF = degree of freedom, \*\* = the relevant individual and interactive effect is significant ( $p < 0.01$ ), \* = the relevant individual and interactive effect is significant ( $p < 0.05$ )

**Table S2.** Analysis of variance for the individual and interactive effect of different mulches and production systems on weed density and biomass in wheat crop at Multan.

| SOV                    | DF | Sum of Squares | Mean Squares | F value | P value  |
|------------------------|----|----------------|--------------|---------|----------|
| Weed density at 45 DAS |    |                |              |         |          |
| Mulches (M)            | 6  | 411.284        | 68.547       | 199.57  | 0.0200*  |
| Production systems (P) | 2  | 54.262         | 27.131       | 78.99   | 0.0250*  |
| M × P                  | 12 | 33.169         | 2.764        | 8.05    | 0.0400*  |
| Weed density at 65 DAS |    |                |              |         |          |
| Mulches (M)            | 6  | 14397.0        | 2399.51      | 516.55  | 0.0230*  |
| Production systems (P) | 2  | 2388.3         | 1194.14      | 257.07  | 0.0400*  |
| M × P                  | 12 | 1237.0         | 103.09       | 22.19   | 0.0320*  |
| Weed biomass at 45 DAS |    |                |              |         |          |
| Mulches (M)            | 6  | 5966.88        | 994.48       | 737.13  | 0.0010** |
| Production systems (P) | 2  | 948.46         | 274.229      | 351.51  | 0.0200*  |
| M × P                  | 12 | 247.87         | 20.656       | 15.31   | 0.0310*  |
| Weed biomass at 65 DAS |    |                |              |         |          |
| Mulches (M)            | 6  | 41771.3        | 6961.88      | 1597.23 | 0.0400*  |
| Production systems (P) | 2  | 8650.8         | 4325.40      | 992.35  | 0.0300*  |
| M × P                  | 12 | 1879.0         | 156.58       | 35.92   | 0.0250*  |

SOV = sources of variation, DF = degree of freedom, \* = the relevant individual and interactive effect is significant ( $p < 0.05$ )

**Table S3.** Analysis of variance for the individual and interactive effect of different mulches and production systems on weed density and biomass in wheat crop at Hafizabad.

| SOV                    | DF | Sum of Squares | Mean Squares | F value | P value |
|------------------------|----|----------------|--------------|---------|---------|
| Weed density at 45 DAS |    |                |              |         |         |
| Mulches (M)            | 6  | 839.76         | 139.96       | 361.63  | 0.0200* |
| Production systems (P) | 2  | 185.33         | 92.664       | 239.42  | 0.0400* |
| M × P                  | 12 | 92.02          | 7.669        | 19.81   | 0.0230* |
| Weed density at 65 DAS |    |                |              |         |         |
| Mulches (M)            | 6  | 17387.7        | 2897.94      | 983.15  | 0.0300* |
| Production systems (P) | 2  | 3628.6         | 1814.29      | 615.51  | 0.0400* |
| M × P                  | 12 | 1203.2         | 100.27       | 34.02   | 0.0330* |
| Weed biomass at 45 DAS |    |                |              |         |         |
| Mulches (M)            | 6  | 7136.05        | 1189.34      | 1265.64 | 0.0300* |
| Production systems (P) | 2  | 1514.95        | 757.47       | 806.06  | 0.0200* |
| M × P                  | 12 | 420.96         | 35.08        | 37.33   | 0.0300* |
| Weed biomass at 65 DAS |    |                |              |         |         |
| Mulches (M)            | 6  | 37000.1        | 6166.68      | 1016.62 | 0.0100* |
| Production systems (P) | 2  | 7866.9         | 3933.44      | 648.45  | 0.0220* |
| M × P                  | 12 | 2125.3         | 177.11       | 29.20   | 0.0420* |

SOV = sources of variation, DF = degree of freedom, \* = the relevant individual and interactive effect is significant ( $p < 0.05$ )

**Table S4.** Analysis of variance for the individual and interactive effect of different mulches and production systems on weed density and biomass in wheat crop at Faisalabad.

| SOV                    | DF | Sum of Squares | Mean Squares | F value | P value |
|------------------------|----|----------------|--------------|---------|---------|
| Weed density at 45 DAS |    |                |              |         |         |
| Mulches (M)            | 6  | 620.385        | 103.397      | 545.35  | 0.0200* |
| Production systems (P) | 2  | 135.974        | 67.987       | 358.58  | 0.0330* |
| M × P                  | 12 | 39.414         | 3.285        | 17.32   | 0.0400* |
| Weed density at 65 DAS |    |                |              |         |         |
| Mulches (M)            | 6  | 8219.9         | 1369.99      | 253.59  | 0.0300* |
| Production systems (P) | 2  | 2400.7         | 1200.33      | 222.19  | 0.0400* |
| M × P                  | 12 | 582.4          | 48.54        | 8.98    | 0.0330* |
| Weed biomass at 45 DAS |    |                |              |         |         |
| Mulches (M)            | 6  | 2429.33        | 404.888      | 879.30  | 0.0300* |
| Production systems (P) | 2  | 932.71         | 466.354      | 1012.79 | 0.0200* |
| M × P                  | 12 | 116.52         | 9.71         | 21.09   | 0.0230* |
| Weed biomass at 65 DAS |    |                |              |         |         |
| Mulches (M)            | 6  | 12357.7        | 2059.62      | 899.52  | 0.0230* |
| Production systems (P) | 2  | 4702.3         | 2351.16      | 1026.85 | 0.0420* |
| M × P                  | 12 | 569.0          | 47.42        | 20.71   | 0.0260* |

SOV = sources of variation, DF = degree of freedom, \* = the relevant individual and interactive effect is significant ( $p < 0.05$ )

**Table S5.** Analysis of variance for the individual and interactive effect of different mulches and production systems on plant height and number of productive tillers of wheat.

| Location                                     | SOV                    | DF | Sum of Squares | Mean Squares | F value | P value              |
|----------------------------------------------|------------------------|----|----------------|--------------|---------|----------------------|
| Plant height (cm)                            |                        |    |                |              |         |                      |
| Faisalabad                                   | Mulches (M)            | 6  | 503.74         | 83.957       | 99.01   | 0.0300*              |
|                                              | Production systems (P) | 2  | 567.53         | 283.766      | 334.64  | 0.0200*              |
|                                              | M × P                  | 12 | 15.33          | 1.278        | 1.51    | 0.1621 <sup>NS</sup> |
| Hafizabad                                    | Mulches (M)            | 6  | 889.55         | 148.259      | 277.28  | 0.0200*              |
|                                              | Production systems (P) | 2  | 742.03         | 371.015      | 693.9   | 0.0420*              |
|                                              | M × P                  | 12 | 18.34          | 1.529        | 2.86    | 0.0203*              |
| Multan                                       | Mulches (M)            | 6  | 628.22         | 104.703      | 35.91   | 0.0010**             |
|                                              | Production systems (P) | 2  | 851.03         | 425.517      | 145.95  | 0.0200*              |
|                                              | M × P                  | 12 | 69.59          | 5.799        | 1.99    | 0.0518*              |
| Number of productive tillers m <sup>-2</sup> |                        |    |                |              |         |                      |
| Faisalabad                                   | Mulches (M)            | 6  | 34888.5        | 5814.7       | 78.52   | 0.0400*              |
|                                              | Production systems (P) | 2  | 25205.6        | 12602.8      | 170.18  | 0.0200*              |
|                                              | M × P                  | 12 | 2334.5         | 194.5        | 2.63    | 0.0190*              |
| Hafizabad                                    | Mulches (M)            | 6  | 23296.4        | 3882.7       | 247.78  | 0.0170*              |
|                                              | Production systems (P) | 2  | 33624.6        | 16812.3      | 1072.88 | 0.0300*              |
|                                              | M × P                  | 12 | 472.7          | 39.4         | 2.51    | 0.0244*              |
| Multan                                       | Mulches (M)            | 6  | 28373.5        | 4728.91      | 50.78   | 0.0200*              |
|                                              | Production systems (P) | 2  | 18224.7        | 9112.33      | 97.85   | 0.0000**             |
|                                              | M × P                  | 12 | 7572.1         | 631.01       | 6.78    | 0.0300*              |

SOV = sources of variation, DF = degree of freedom, \*\* = the relevant individual and interactive effect is significant ( $p < 0.01$ ), \* = the relevant individual and interactive effect is significant ( $p < 0.05$ ), NS = non-significant

**Table S6.** Analysis of variance for the individual and interactive effect of different mulches and production systems on spike length and number of grains per spike of wheat.

| Location                   | SOV                    | DF | Sum of Squares | Mean Squares | F value | P value               |
|----------------------------|------------------------|----|----------------|--------------|---------|-----------------------|
| Spike length (cm)          |                        |    |                |              |         |                       |
| Faisalabad                 | Mulches (M)            | 6  | 21.5660        | 3.59434      | 81.66   | 0.0200*               |
|                            | Production systems (P) | 2  | 18.8765        | 9.43825      | 214.43  | 0.0020*               |
|                            | M × P                  | 12 | 0.7635         | 0.06362      | 1.45    | 0.1863 <sup>NS</sup>  |
| Hafizabad                  | Mulches (M)            | 6  | 19.8063        | 3.30106      | 67.76   | 0.03000*              |
|                            | Production systems (P) | 2  | 18.0238        | 9.01190      | 185.00  | 0.02000*              |
|                            | M × P                  | 12 | 1.0917         | 0.09098      | 1.87    | 0.06940 <sup>NS</sup> |
| Multan                     | Mulches (M)            | 6  | 17.9749        | 2.99582      | 34.28   | 0.0000**              |
|                            | Production systems (P) | 2  | 15.3724        | 7.68619      | 87.94   | 0.0000**              |
|                            | M × P                  | 12 | 0.9965         | 0.08304      | 0.95    | 0.5096 <sup>NS</sup>  |
| Number of grains per spike |                        |    |                |              |         |                       |
| Faisalabad                 | Mulches (M)            | 6  | 405.341        | 67.557       | 89.68   | 0.0000**              |
|                            | Production systems (P) | 2  | 336.248        | 168.124      | 223.18  | 0.0200*               |
|                            | M × P                  | 12 | 50.901         | 4.242        | 5.63    | 0.0300*               |
| Hafizabad                  | Mulches (M)            | 6  | 458.237        | 76.373       | 127.14  | 0.0200*               |
|                            | Production systems (P) | 2  | 310.402        | 155.201      | 258.37  | 0.0320*               |
|                            | M × P                  | 12 | 11.240         | 0.937        | 1.56    | 0.1437 <sup>NS</sup>  |
| Multan                     | Mulches (M)            | 6  | 316.334        | 52.722       | 78.40   | 0.0000**              |
|                            | Production systems (P) | 2  | 264.858        | 132.429      | 196.93  | 0.0300*               |
|                            | M × P                  | 12 | 14.729         | 1.227        | 1.83    | 0.0769 <sup>NS</sup>  |

SOV = sources of variation, DF = degree of freedom, \*\* = the relevant individual and interactive effect is significant ( $p < 0.01$ ), \* = the relevant individual and interactive effect is significant ( $p < 0.05$ ), NS = non-significant

**Table S7.** Analysis of variance for the individual and interactive effect of different mulches and production systems on thousand grain weight and biological yield of wheat.

| Location                               | SOV                    | DF | Sum of Squares | Mean Squares | F value | P value  |
|----------------------------------------|------------------------|----|----------------|--------------|---------|----------|
| 1000-grain weight (g)                  |                        |    |                |              |         |          |
| Faisalabad                             | Mulches (M)            | 6  | 105.975        | 17.6625      | 104.75  | 0.0300*  |
|                                        | Production systems (P) | 2  | 118.797        | 59.3987      | 352.28  | 0.0220*  |
|                                        | M × P                  | 12 | 4.954          | 0.4128       | 2.45    | 0.0169*  |
| Hafizabad                              | Mulches (M)            | 6  | 106.264        | 17.7107      | 116.24  | 0.0300*  |
|                                        | Production systems (P) | 2  | 114.744        | 57.3719      | 376.56  | 0.0100** |
|                                        | M × P                  | 12 | 5.825          | 0.4854       | 3.19    | 0.0290*  |
| Multan                                 | Mulches (M)            | 6  | 115.098        | 19.1830      | 54.63   | 0.0300*  |
|                                        | Production systems (P) | 2  | 97.390         | 48.6948      | 138.68  | 0.0000** |
|                                        | M × P                  | 12 | 15.333         | 1.2777       | 3.64    | 0.0230*  |
| Biological yield (t ha <sup>-1</sup> ) |                        |    |                |              |         |          |
| Faisalabad                             | Mulches (M)            | 6  | 97.024         | 16.1707      | 302.39  | 0.0300*  |
|                                        | Production systems (P) | 2  | 124.169        | 62.0843      | 1160.97 | 0.0200*  |
|                                        | M × P                  | 12 | 6.143          | 0.5119       | 9.57    | 0.0220*  |
| Hafizabad                              | Mulches (M)            | 6  | 86.909         | 14.4848      | 318.07  | 0.0200*  |
|                                        | Production systems (P) | 2  | 106.036        | 53.0178      | 1164.21 | 0.0000** |
|                                        | M × P                  | 12 | 3.291          | 0.2743       | 6.02    | 0.0340*  |
| Multan                                 | Mulches (M)            | 6  | 166.492        | 27.7487      | 256.69  | 0.0000** |
|                                        | Production systems (P) | 2  | 127.465        | 63.7325      | 589.57  | 0.0000** |
|                                        | M × P                  | 12 | 3.828          | 0.3190       | 2.95    | 0.0350*  |

SOV = sources of variation, DF = degree of freedom, \*\* = the relevant individual and interactive effect is significant ( $p < 0.01$ ), \* = the relevant individual and interactive effect is significant ( $p < 0.05$ )

**Table S8.** Analysis of variance for the individual and interactive effect of different mulches and production systems on grain and straw yields of wheat.

| Location                          | SOV                    | DF | Sum of Squares | Mean Squares | F value | P value |
|-----------------------------------|------------------------|----|----------------|--------------|---------|---------|
| Grain yield (t ha <sup>-1</sup> ) |                        |    |                |              |         |         |
| Faisalabad                        | Mulches (M)            | 6  | 11.1238        | 1.8540       | 205.09  | 0.0210* |
|                                   | Production systems (P) | 2  | 20.7165        | 10.3583      | 1145.86 | 0.0110* |
|                                   | M × P                  | 12 | 0.3124         | 0.0260       | 2.88    | 0.0260* |
| Hafizabad                         | Mulches (M)            | 6  | 18.1787        | 3.02979      | 370.99  | 0.0000* |
|                                   | Production systems (P) | 2  | 16.3267        | 8.16333      | 999.59  | 0.0200* |
|                                   | M × P                  | 12 | 0.5556         | 0.0463       | 5.67    | 0.0330* |
| Multan                            | Mulches (M)            | 6  | 7.8689         | 1.31148      | 280.08  | 0.0100* |
|                                   | Production systems (P) | 2  | 7.6803         | 3.84016      | 820.10  | 0.0200* |
|                                   | M × P                  | 12 | 0.2797         | 0.02331      | 4.98    | 0.0231* |
| Straw yield (t ha <sup>-1</sup> ) |                        |    |                |              |         |         |
| Faisalabad                        | Mulches (M)            | 6  | 42.8743        | 7.1457       | 119.63  | 0.0230* |
|                                   | Production systems (P) | 2  | 43.1851        | 21.5925      | 361.5   | 0.0290* |
|                                   | M × P                  | 12 | 5.0038         | 0.4170       | 6.98    | 0.0200* |
| Hafizabad                         | Mulches (M)            | 6  | 28.0521        | 4.6753       | 100.67  | 0.0300* |
|                                   | Production systems (P) | 2  | 40.9470        | 20.4735      | 440.82  | 0.0230* |
|                                   | M × P                  | 12 | 2.2641         | 0.1887       | 4.06    | 0.0190* |
| Multan                            | Mulches (M)            | 6  | 102.582        | 17.0970      | 186.45  | 0.0220* |
|                                   | Production systems (P) | 2  | 73.649         | 36.8245      | 401.59  | 0.0300* |
|                                   | M × P                  | 12 | 3.268          | 0.2723       | 2.97    | 0.0048* |

SOV = sources of variation, DF = degree of freedom, \*\* = the relevant individual and interactive effect is significant ( $p < 0.01$ ), \* = the relevant individual and interactive effect is significant ( $p < 0.05$ )

**Table S9.** Analysis of variance for the individual and interactive effect of different mulches and production systems on harvest index of wheat.

| Location      | SOV                    | DF | Sum of Squares | Mean Squares | F value | P value              |
|---------------|------------------------|----|----------------|--------------|---------|----------------------|
| Harvest index |                        |    |                |              |         |                      |
| Faisalabad    | Mulches (M)            | 6  | 72.017         | 12.003       | 14.81   | 0.0180*              |
|               | Production systems (P) | 2  | 210.564        | 105.282      | 129.93  | 0.0200*              |
|               | M × P                  | 12 | 78.201         | 6.517        | 8.04    | 0.0300*              |
| Hafizabad     | Mulches (M)            | 6  | 330.558        | 55.093       | 50.70   | 0.0320*              |
|               | Production systems (P) | 2  | 146.250        | 73.1249      | 67.30   | 0.0400*              |
|               | M × P                  | 12 | 68.855         | 5.7379       | 5.28    | 0.0380*              |
| Multan        | Mulches (M)            | 6  | 286.93         | 47.822       | 3.08    | 0.0143*              |
|               | Production systems (P) | 2  | 50.42          | 25.2097      | 1.62    | 0.2103 <sup>NS</sup> |
|               | M × P                  | 12 | 309.27         | 25.7721      | 1.66    | 0.1142 <sup>NS</sup> |

SOV = sources of variation, DF = degree of freedom, \* = the relevant individual and interactive effect is significant ( $p < 0.05$ ), NS = non-significant
